# Supplementary material for: A simple chemiluminescent aptasensor for the detection of α-fetoprotein based on iron-based metal organic frameworks
Source: Royal Society of Chemistry journal article supplement (doi:10.1039/c9nj05870b), 2020-01-01
Supplement: c9nj05870b1.pdf [file c9nj05870b1.pdf]

## **Electronic Supplementary Information**

### **A simple chemiluminesce aptasensor for detection of $\alpha$ -fetoprotein based on iron-based metal organic frameworks**

**Rui Han, Yuanling Sun, Yanna Lin, Hao Liu, Yuxue Dai, Xiaodong Zhu, Dandan Gao,**

**Xueying Wang \*, Chuannan Luo\***

Key Laboratory of Interfacial Reaction & Sensing Analysis in Universities of Shandong, School of Chemistry and Chemical Engineering, University of Jinan, Jinan 250022, PR China

\*Corresponding author: Tel.: +86 0531 89736065. Dr. Xueying Wang and Pro. Chuannan Luo

are both the corresponding author of this article.

E-mail address: chm\_wangxy@ujn.edu.cn (Xueying Wang); chm\_sunyl@126.com (Chuannan Luo)

## **1.Experimental Section**

### **1.1. Reagents and Solutions.**

$\text{FeCl}_3 \cdot 6\text{H}_2\text{O}$  was obtained from fengchuan Chemical Co., Ltd. (Tianjin,China). Trimesic acid ( $\text{H}_3\text{BTC}$ ) and terephthalate ( $\text{H}_2\text{BDC}$ ) were purchased from Shanghai Macklin Biochemical Co., Ltd. (Shanghai, China). Luminol was ordered from West Asia Chemical Industry Co., Ltd. (Shandong, China). N, N-dimethylformamide (DMF) was obtained from Damao Chemical Reagent Factory (Tianjin, China).  $\alpha$ -fetoprotein (AFP), Bovine serum albumin (BSA), adrenaline and Glucose (Glc) were purchased from Solebo Biological Technology Co. Ltd. (Beijing, China). Sodium hydroxide, sodium chloride, ethanol, hydrogen peroxide and all other chemicals unless specified were analytical reagent grade and used without further purification. AFP aptamer

(AFP-Apt): 5'-ATCAGGTGCAGTTCTCGACTCGGTCTTGATGTGGG-3' was purchased from Sangon Biotech Company (Shanghai, China). Regarding the preparation of the aptamer solution, the AFP aptamer was slowly heated to 90 °C for 10 minutes before use of the aptamer, and then cooled to room temperature to unwind the single-stranded oligonucleotide. Redistilled water was used throughout the work. Phosphate buffer (PBS, pH = 7.4, 0.01 mol/L) solution was used as working buffer solution.

### **1.2. Equipment.**

Regulus 8100 scanning electron microscope was utilized to characterize the morphology of Fe-MOFs. The determination of zeta potential was carried out by using a Malvern Zetasizer 2000. All functional groups or chemical bonds contained in the material were identified by VERTEX70 Fourier infrared spectrometer. The specific surface area of Fe-MOFs was measured by a fully automatic surface area and pore size analyzer. All electrochemical measurements were performed on a CHI 760D electrochemical workstation. UV-vis absorption spectra was obtained from a Lambda 35 UV-vis spectrometer. Fluorescence experiments were carried out on a Shimadzu RF-5301 Fluorescence. The results of the wavelength measurement of the chemiluminescence system were obtained by adding a filter to a fluorescent device.

### **1.3. Preparation of Fe-MOFs.**

MIL-53 (Fe): 1.00 mM of  $\text{FeCl}_3 \cdot 6\text{H}_2\text{O}$  and 1.00 mM of  $\text{H}_2\text{BDC}$  were added to 6 mL of DMF and stirred at room temperature. Then the reaction mixture was transferred to a reactor with teflon liner and reacted for 3 h at 150 °C. After cooling to

room temperature, the mixture was centrifuged and washed with DMF, ethanol and water, respectively. Finally, the brown powder was obtained by vacuum drying at 60 °C <sup>1</sup>.

MIL-88B (Fe): 1.00 mM FeCl<sub>3</sub>·6H<sub>2</sub>O and 0.43 mM H<sub>2</sub>BDC were transferred to the mixture of 5 mL DMF and 0.4 mL 2 M NaOH solution. The reaction mixture were stirred at room temperature to a reactor with teflon liner and reacted for 12 h at 100 °C. After cooling to room temperature, the mixture was centrifuged and washed with DMF, ethanol and water, respectively. Finally, the brown powder was obtained by vacuum drying at 60 °C <sup>2</sup>.

MIL-100 (Fe): 1.00 mM FeCl<sub>3</sub>·6H<sub>2</sub>O, 0.52 mM H<sub>3</sub>BTC, and 6 mL of ultrapure water were stirred at room temperature, then the reaction mixture was transferred to a reaction kettle and reacted for 72 h at 130 °C. After that, the product was purified by 70 mL ultrapure water and 70 mL absolute ethanol for 12 h at 70 °C, Finally, the mixture was centrifuged and the brown powder was obtained by vacuum drying at 60 °C <sup>3,4</sup>.

#### 1.4. AFP detection process

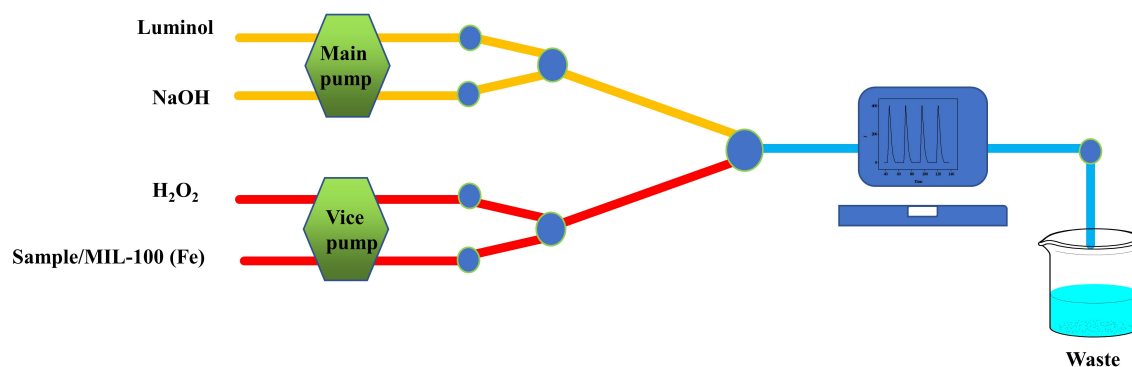

Fig. S1. The schematic of MPI-F flow injection chemiluminescence analyzer.

## 1.5. FTIR of Fe-MOFs

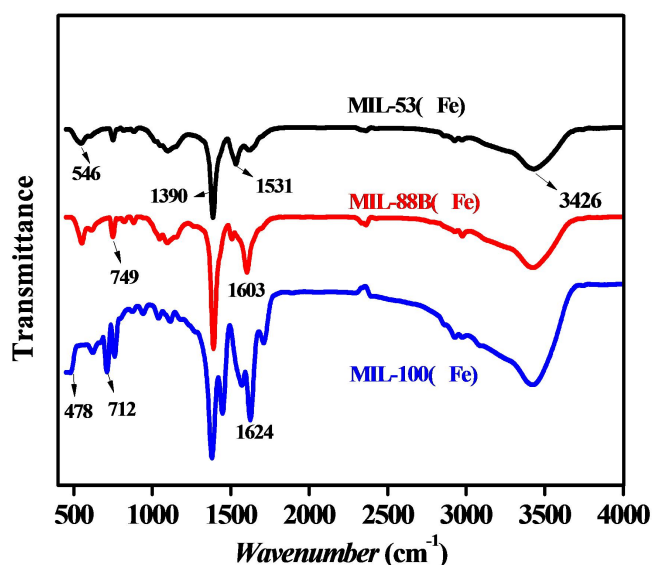

Fig. S2. FTIR spectra of Fe-MOFs.

Fig. S2 showed the FTIR of Fe-MOFs in the wavenumber range of 500cm<sup>-1</sup> - 4000 cm<sup>-1</sup>. In the spectrum of Fe-MOFs, a broad and strong absorption peak appears at 3426 cm<sup>-1</sup>, which belongs to the stretching vibration peak of O-H. The strong peaks at 1531 cm<sup>-1</sup> and 1390 cm<sup>-1</sup> in MIL-53 (Fe) curve are attributed to the asymmetric and symmetric vibrations of carboxyl groups, respectively. The strong peaks at the 1603 cm<sup>-1</sup> and 1390 cm<sup>-1</sup> in MIL-88B (Fe) curve are correspond to the asymmetric and symmetric vibrations of carboxyl groups. Furthermore, in the spectrum of MIL-53 (Fe) and MIL-88B (Fe), the absorption peaks at 749 cm<sup>-1</sup> and 546 cm<sup>-1</sup> belong to the stretching vibration peak of C-H on benzene ring and Fe-O, respectively. The characteristic peaks at 1624 cm<sup>-1</sup>, 1390 cm<sup>-1</sup>, 712 cm<sup>-1</sup> and 478 cm<sup>-1</sup> in the spectra of MIL-100 (Fe) are ascribed to asymmetric vibrations of -O-C-O-, the symmetric vibrations of -O-C-O-, the stretching vibration of C-H and the stretching vibration of Fe-O, respectively.

## 1.6. BET of Fe-MOFs

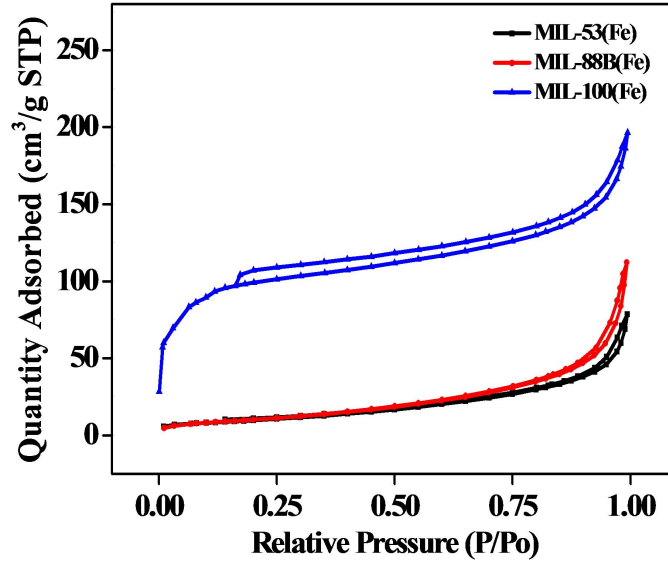

Fig. S3. BET of Fe-MOFs.

The specific surface area of Fe-MOFs were as follows: MIL-100 (Fe) (316.95 m<sup>2</sup>/g) > MIL-88B (Fe) (39.86 m<sup>2</sup>/g) > MIL-53 (Fe) (36.44 m<sup>2</sup>/g). The corresponding average pore size showed a different order: MIL-88B (Fe) (13.01 nm) > MIL-53 (Fe) (10.64 nm) > MIL-100 (Fe) (9.12 nm).

## 1.7. The immobilization capacity calculation formula

$$Q_e = (c_0 - c_e)V/m$$

Where  $Q_e$  (mol/mg) was the mass of AFP-apt adsorbed per unit mass of dry MIL-100 (Fe),  $c_0$  (mol/L) and  $c_e$  (mol/L) were the concentration of AFP-apt in the initial and final solution, respectively,  $V$  (L) was the volume of the adsorption mixture, and  $m$  (mg) was the mass of the MIL-100 (Fe).

**Table S1**

Determination of AFP in real samples.

| Samples | Added ( $10^{-8}$ g/L) | Found <sup>a</sup> ( $10^{-8}$ g/L) | Recovery (%) | RSD <sup>b</sup> (n = 3, %) |
|---------|------------------------|-------------------------------------|--------------|-----------------------------|
| 1       | Not                    | Not                                 | -            | -                           |
| 2       | 10.00                  | 10.15                               | 101.5        | 2.2                         |
| 3       | 25.00                  | 24.45                               | 97.8         | 1.5                         |
| 4       | 5.00                   | 4.98                                | 99.6         | 1.8                         |
| 5       | 50.00                  | 51.10                               | 102.2        | 2.3                         |
| 6       | 100.00                 | 103.7                               | 103.7        | 3.0                         |

<sup>a</sup> Mean values of three determinations.<sup>b</sup> Standard deviation.**Reference**

- [1] D. Yu, M. Wu, Q. Hu, L. Wang, C. Lv, L. Zhang, Iron-based metal-organic frameworks as novel platforms for catalytic ozonation of organic pollutant: Efficiency and mechanism, Journal of hazardous materials, 367(2019) 456-64.
- [2] C. Gao, S. Chen, X. Quan, H. Yu, Y. Zhang, Enhanced Fenton-like catalysis by iron-based metal organic frameworks for degradation of organic pollutants, Journal of Catalysis, 356(2017) 125-32.
- [3] X. Liu, R. Dang, W. Dong, X. Huang, J. Tang, H. Gao, et al., A sandwich-like heterostructure of TiO<sub>2</sub> nanosheets with MIL-100(Fe): A platform for efficient visible-light-driven photocatalysis, Applied Catalysis B: Environmental, 209(2017) 506-13.
- [4] J.G. Vitillo, A. Bhan, C.J. Cramer, C.C. Lu, L. Gagliardi, Quantum Chemical Characterization of Structural Single Fe(II) Sites in MIL-Type Metal–Organic Frameworks for the Oxidation of Methane to Methanol and Ethane to Ethanol, ACS Catalysis, 9(2019) 2870-9.
