# Supplementary figures and images for: A simple chemiluminescent aptasensor for the detection of α-fetoprotein based on iron-based metal organic frameworks
Source: Royal Society of Chemistry journal article supplement (doi:10.1039/c9nj05870b), 2020-01-01

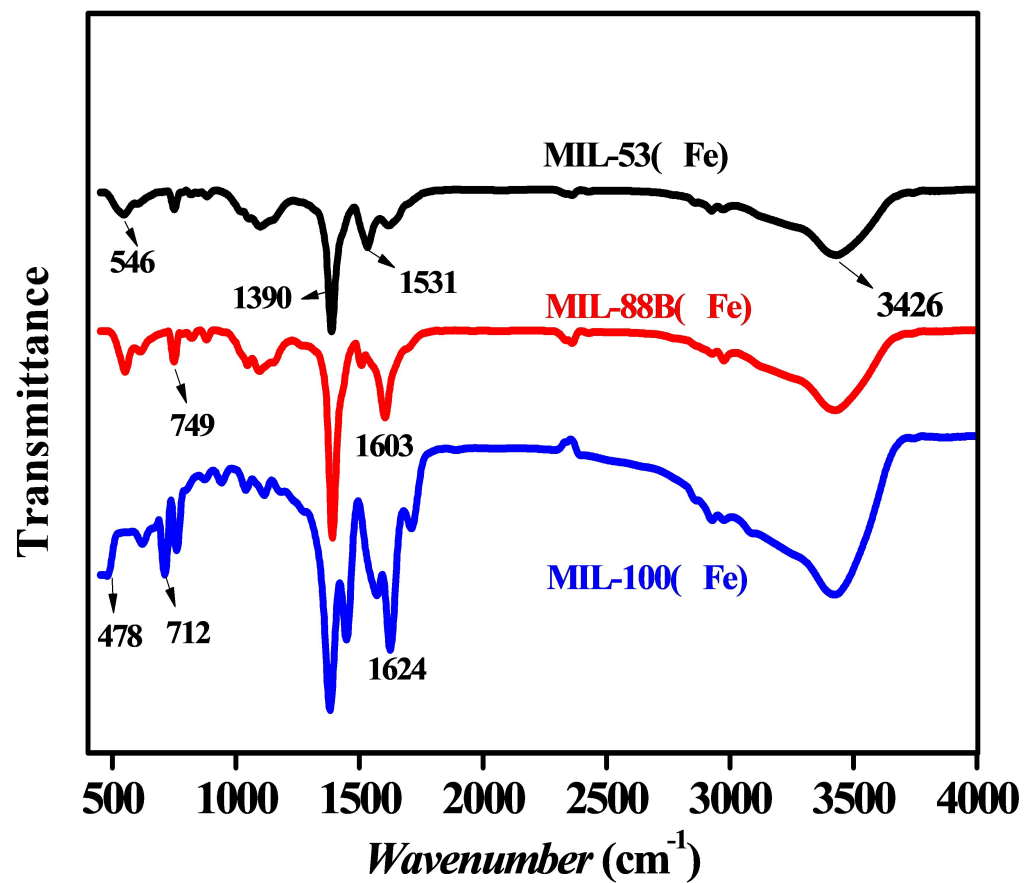

Supplement: c9nj05870b3.pdf [file c9nj05870b3.pdf]
